# Supplementary material for: Next Generation Sequencing Identifies Five Major Classes of Potentially Therapeutic Enzymes Secreted byLucilia sericataMedical Maggots
Source: Hindawi journal article supplement (doi:10.1155/2016/8285428), 2016-01-01
Supplement: f1 [file 8285428.f1.zip]

**Normalized reads assembly using Trinity and 28 individual velvet/oases assemblies**

| <b>Assembly</b> | <b>Contigs</b> |
|-----------------|----------------|
| Trinity         | 50163          |
| Oases k=21      | 133837         |
| Oases k=23      | 116774         |
| Oases k=25      | 108478         |
| Oases k=27      | 104756         |
| Oases k=29      | 99996          |
| Oases k=31      | 96169          |
| Oases k=33      | 90999          |
| Oases k=35      | 84424          |
| Oases k=37      | 77575          |
| Oases k=39      | 72446          |
| Oases k=41      | 67807          |
| Oases k=43      | 63829          |
| Oases k=45      | 59249          |
| Oases k=47      | 55612          |
| Oases k=49      | 52134          |
| Oases k=51      | 49783          |
| Oases k=53      | 47177          |
| Oases k=55      | 44908          |
| Oases k=57      | 42841          |
| Oases k=59      | 40770          |
| Oases k=61      | 38555          |
| Oases k=63      | 36350          |
| Oases k=65      | 34053          |
| Oases k=67      | 31410          |
| Oases k=69      | 28641          |
| Oases k=71      | 25566          |
| Oases k=73      | 21900          |
| Oases k=75      | 17943          |
