# Supplementary figures and images for: Next Generation Sequencing Identifies Five Major Classes of Potentially Therapeutic Enzymes Secreted byLucilia sericataMedical Maggots
Source: Hindawi journal article supplement (doi:10.1155/2016/8285428), 2016-01-01

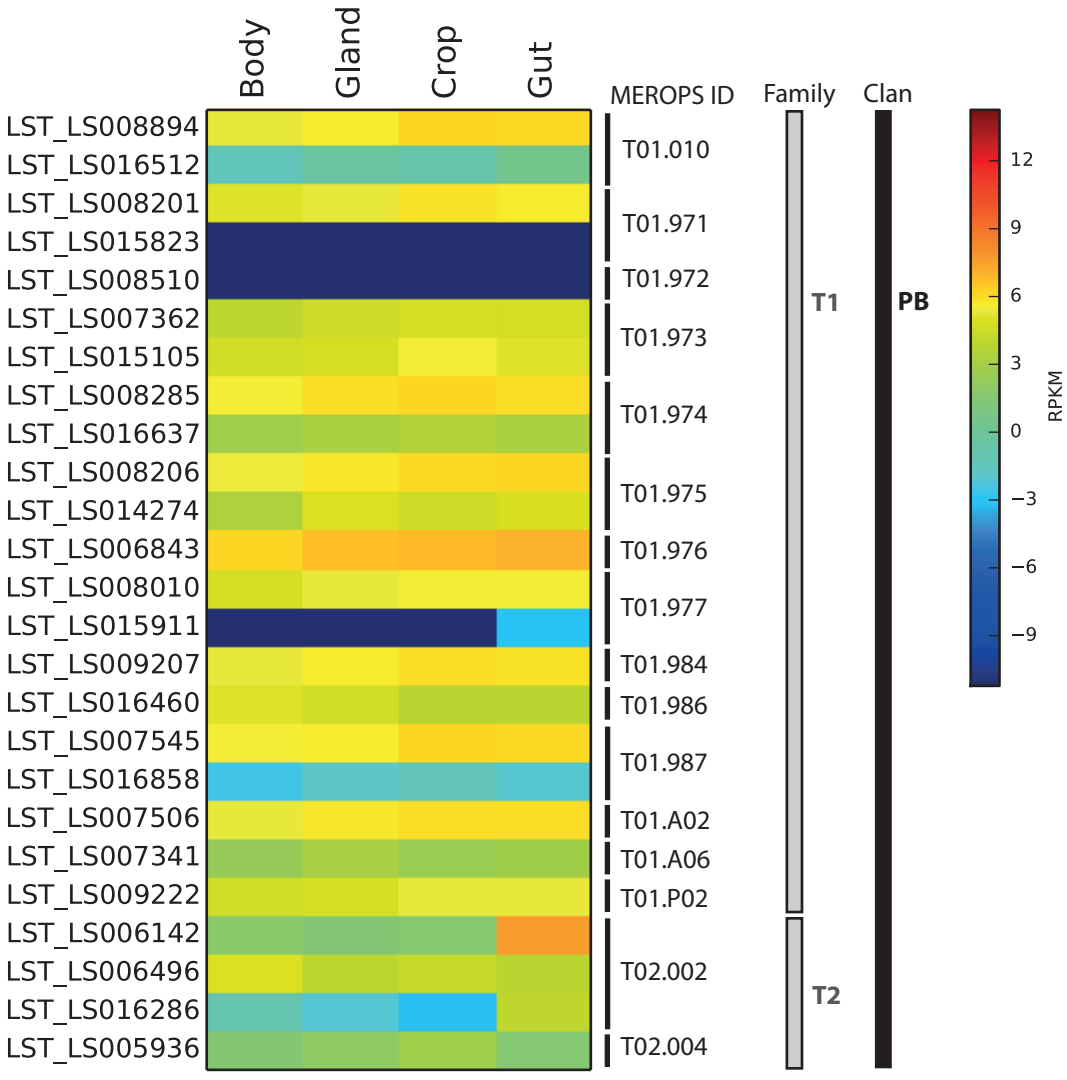

Supplement: f1 [file 8285428.f1.zip]

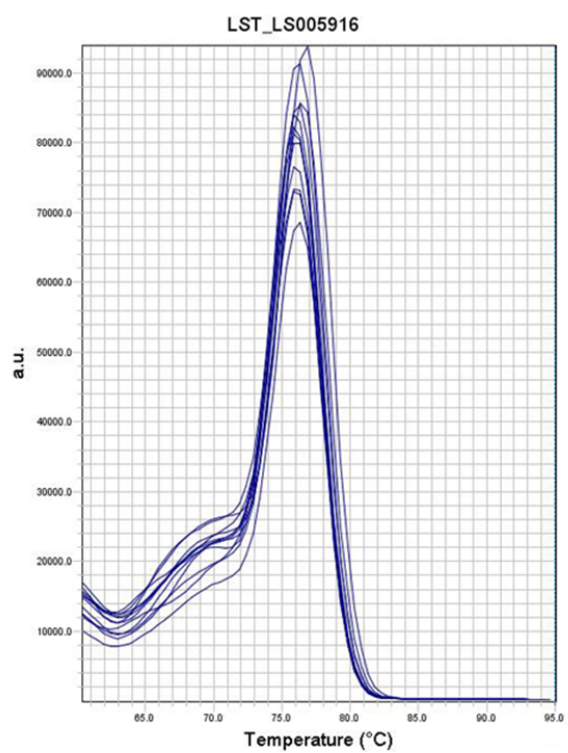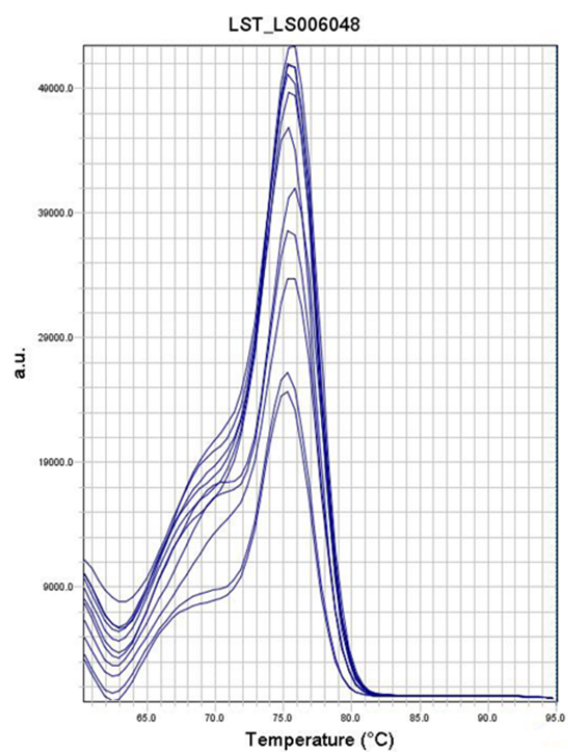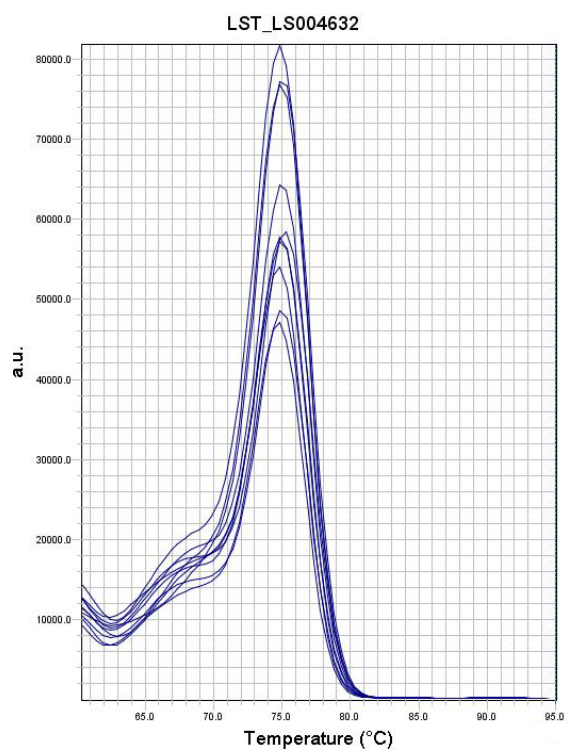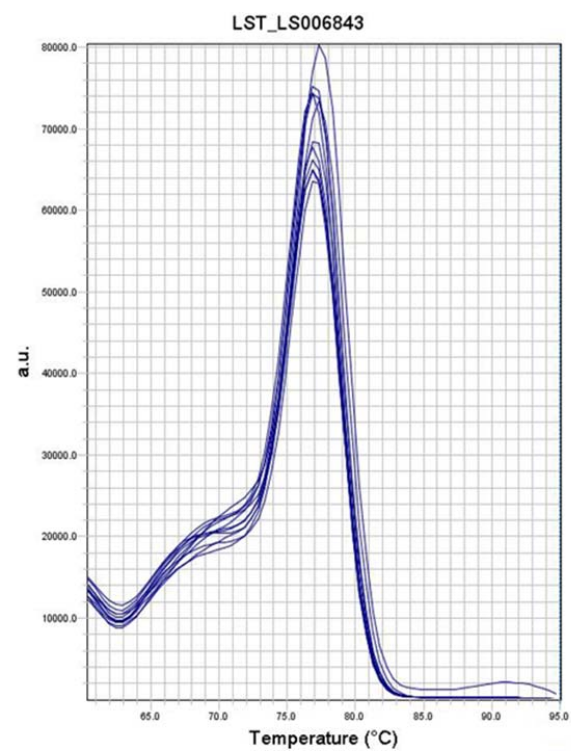

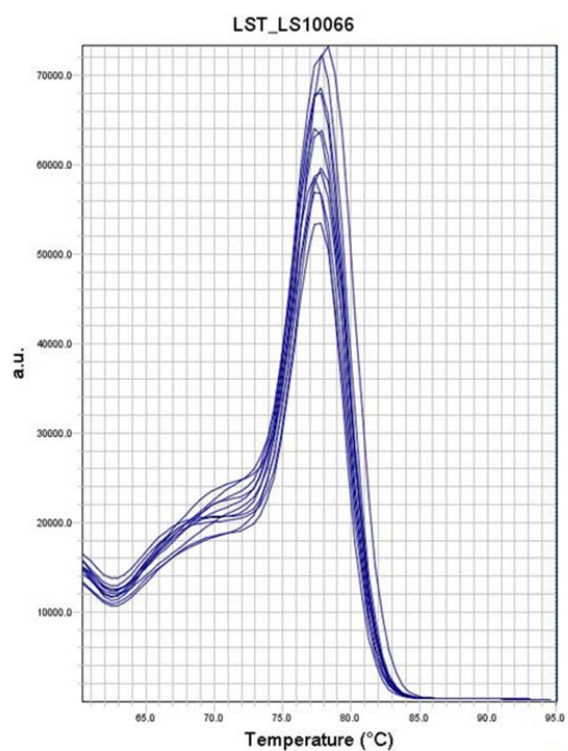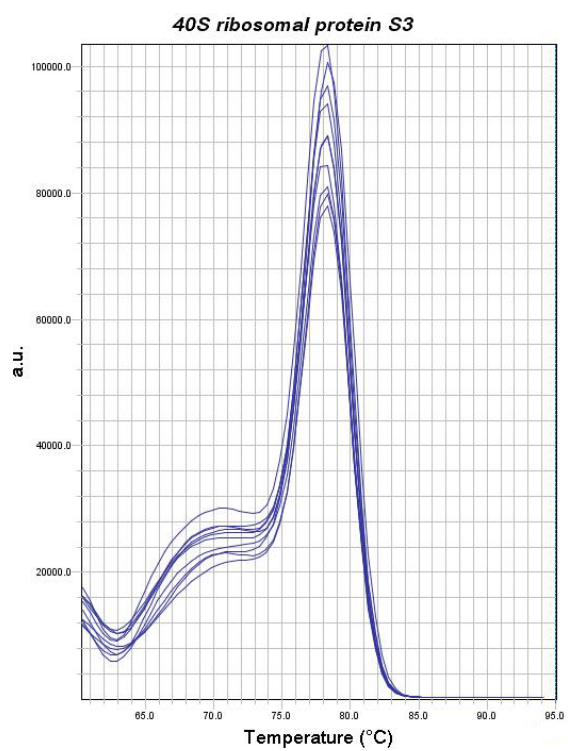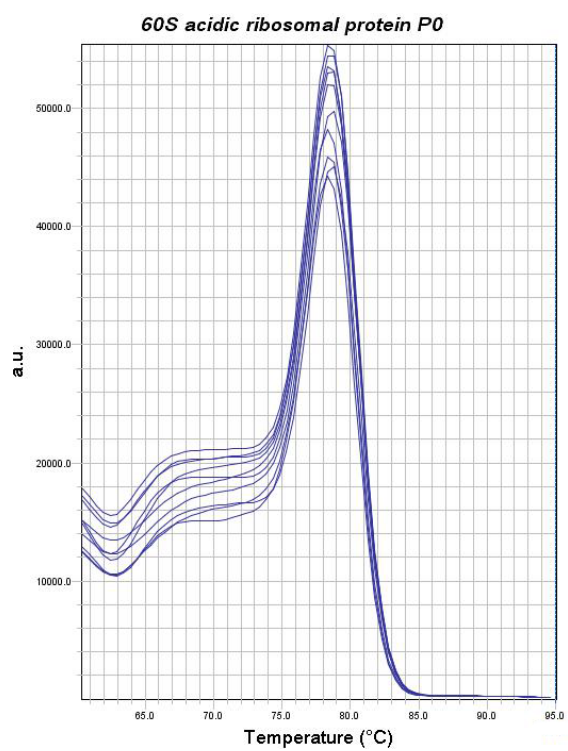

Supplement: f1 [file 8285428.f1.zip]

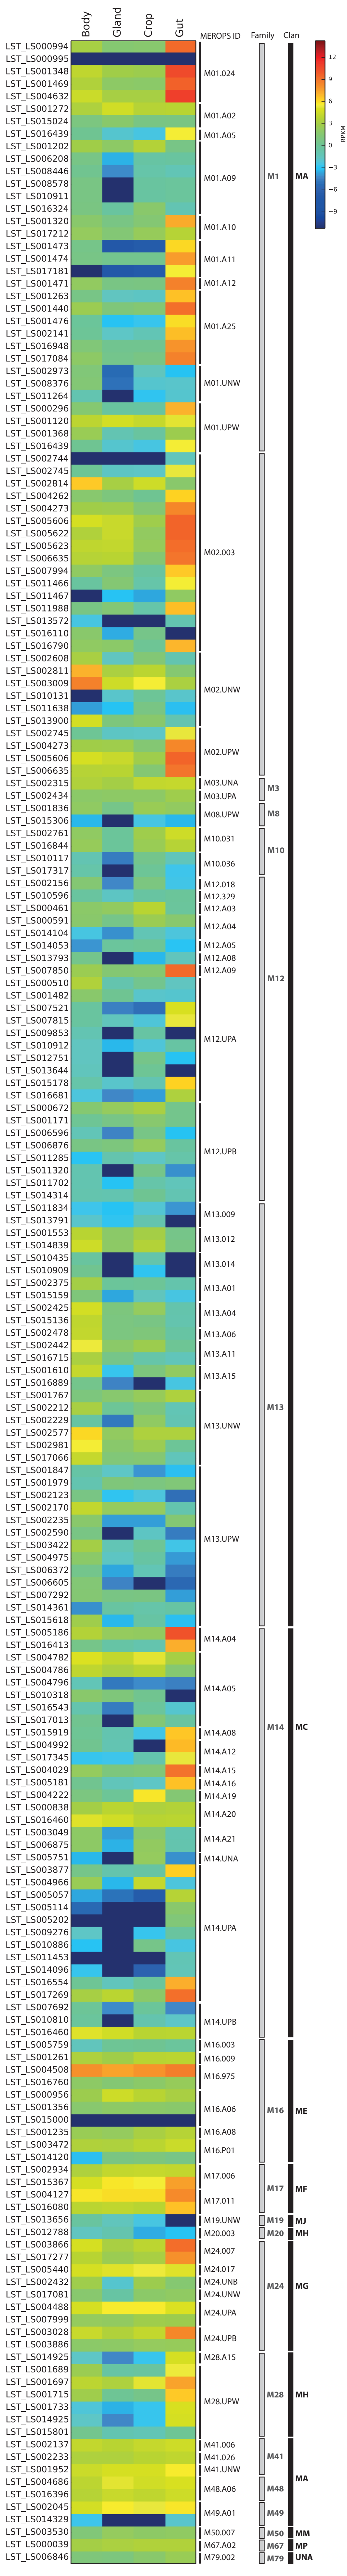

Supplement: f1 [file 8285428.f1.zip]

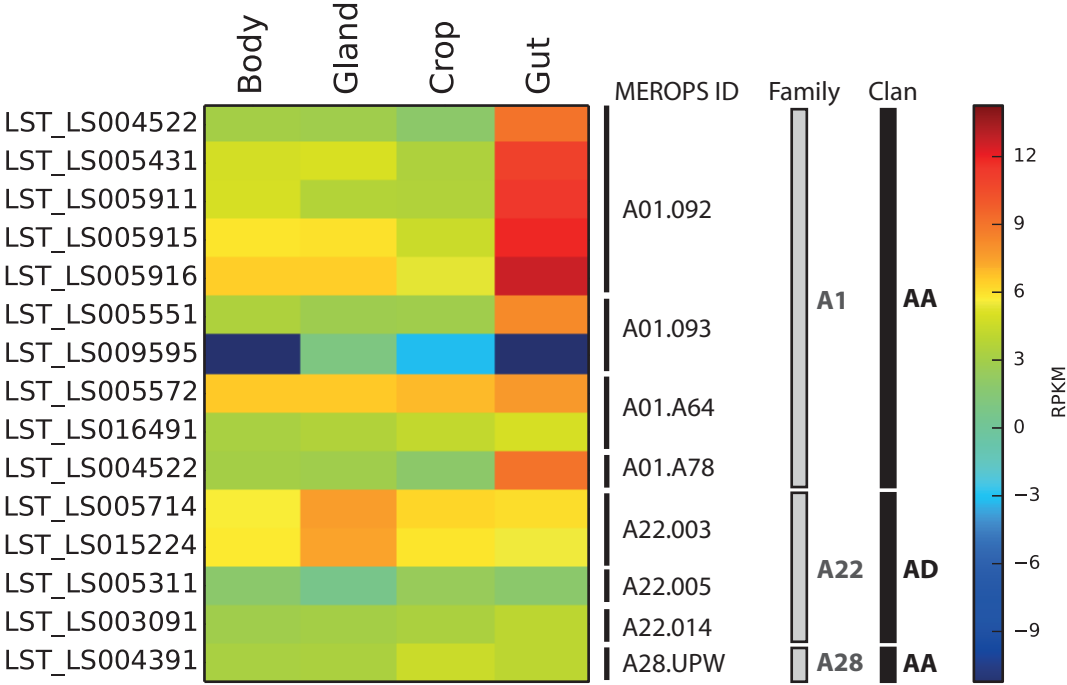

Supplement: f1 [file 8285428.f1.zip]

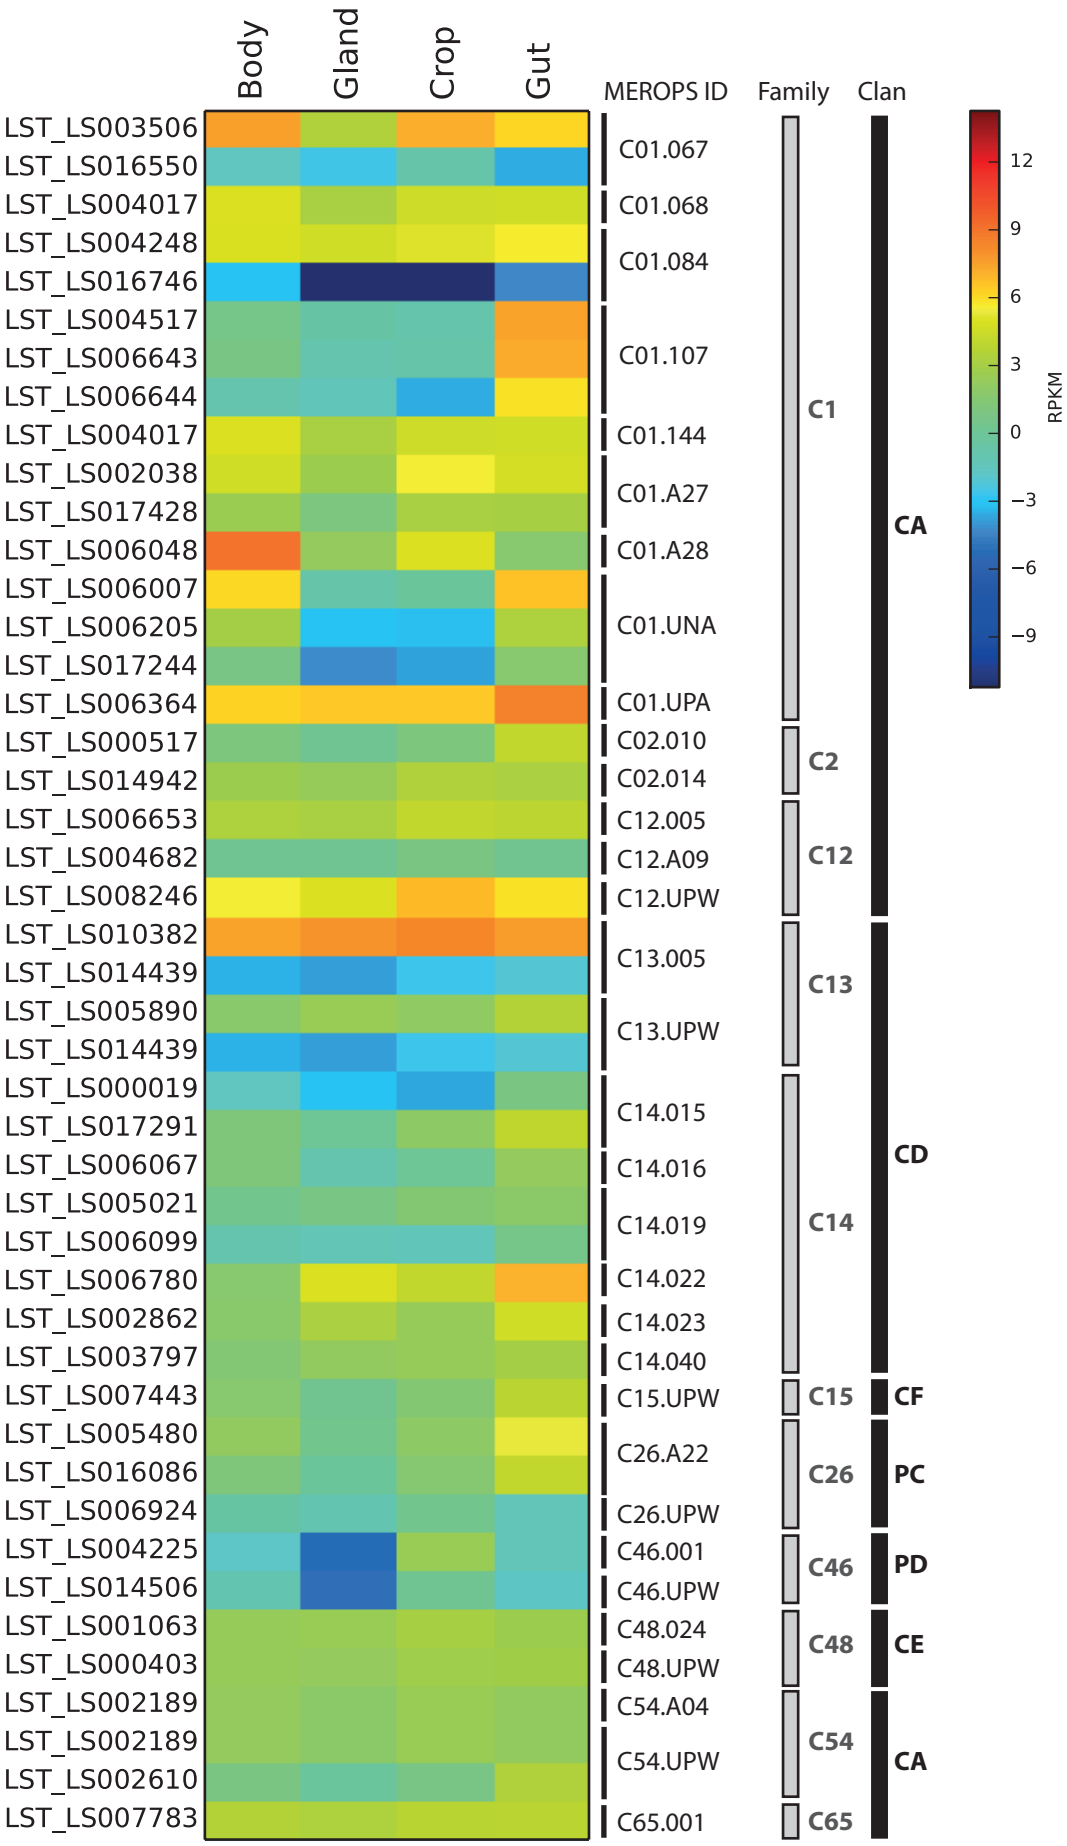

Supplement: f1 [file 8285428.f1.zip]

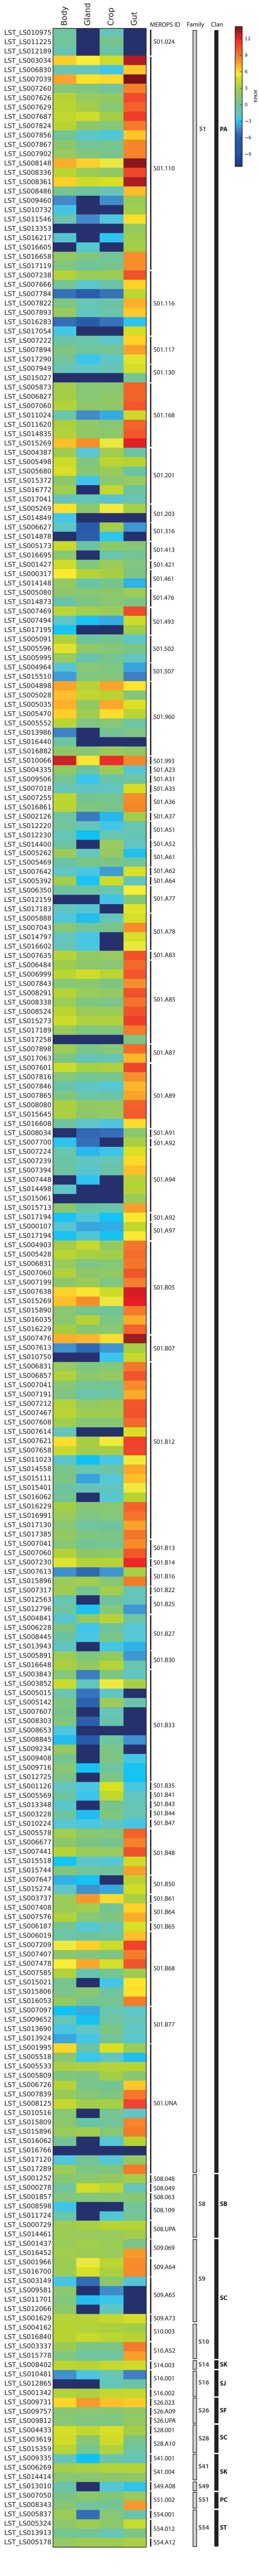

Supplement: f1 [file 8285428.f1.zip]
